# Supplementary material
Source: Springer Nature journal article supplement (https://www.springermedizin.de/resource/supplementary/12906_2012_1205_MOESM1_ESM.pdf/9520126)
Supplement: MOESM1 [file 9520126]

Table 1 The background characteristics of respondents

Respondents (n=311)

|                      | average $\pm$ SD | minimum value | maximum value |
|----------------------|------------------|---------------|---------------|
| Age                  | 49 $\pm$ 8       | 28            | 75            |
| Years of experiences | 23 $\pm$ 8       | 4             | 50            |

Institution (n=549)

|                                                       | Collected | %    |
|-------------------------------------------------------|-----------|------|
| Core cancer treatment hospitals (388)                 | 226       | 58.2 |
| Medical institutions owns Palliative Care Units (161) | 79        | 49.1 |

\* 6 responses could not be identified

|                                                     | number | %    |
|-----------------------------------------------------|--------|------|
| Age group                                           |        |      |
| 20–29 years                                         | 1      | 0.3  |
| 30–39 years                                         | 39     | 12.8 |
| 40–49 years                                         | 119    | 39.1 |
| 50–59 years                                         | 118    | 38.8 |
| 60 years and over                                   | 27     | 8.9  |
| Sex                                                 |        |      |
| Male                                                | 273    | 90.1 |
| Female                                              | 30     | 9.9  |
| Palliative Care Specialists certified by JSPM       |        |      |
| Specialist (including provisional medical advisors) | 128    | 41.2 |
| Non-specialist                                      | 183    | 58.8 |

| Region                     | Hokkaido • Tohoku | Kanto | Chubu | Kinki | Chugoku | Shikoku | Kyushu • Okinawa |
|----------------------------|-------------------|-------|-------|-------|---------|---------|------------------|
| The number of distribution | 79                | 116   | 92    | 91    | 47      | 27      | 97               |
| The number of responses    | 26                | 43    | 41    | 33    | 25      | 11      | 37               |
| The response rate (%)      | 32.9              | 37.1  | 44.6  | 36.3  | 53.2    | 40.7    | 38.1             |

\* 95 responses could not be identified regions
